# Supplementary material
Source: PubMed Central journal article supplement (PMC5678934)
Supplement: NIHMS896452-supplement-2.pdf [file NIHMS896452-supplement-2.pdf]

## SUPPLEMENTARY INFORMATION

### **Asian Zika virus strains target CD14<sup>+</sup> blood monocytes and induce M2-skewed immunosuppression during pregnancy**

Suan-Sin Foo<sup>1</sup>, Weiqiang Chen<sup>1</sup>, Yen Chan<sup>2</sup>, James W. Bowman<sup>1</sup>, Lin-Chun Chang<sup>1</sup>,  
Younho Choi<sup>1</sup>, Ji Seung Yoo<sup>1</sup>, Jianning Ge<sup>1</sup>, Genhong Cheng<sup>3</sup>, Alexandre Bonnin<sup>4</sup>,  
Karin Nielsen-Saines<sup>5</sup>, Patrícia Brasil<sup>6</sup>, Jae U. Jung<sup>1\*</sup>

<sup>1</sup>Department of Molecular Microbiology and Immunology

<sup>2</sup>Division of Maternal-Fetal Medicine, Department of Obstetrics and Gynecology

Keck School of Medicine, University of Southern California, Zilkha Neurogenetic Institute, 1501 San Pablo Street, Los Angeles, CA 90033, USA.

<sup>3</sup>Department of Microbiology, Immunology and Molecular Genetics, University of California, Los Angeles, CA 90095, USA.

<sup>4</sup>Zilkha Neurogenetic Institute and Department of Cell and Neurobiology

Keck School of Medicine, University of Southern California, Zilkha Neurogenetic Institute, 1501 San Pablo Street, Los Angeles, CA 90033, USA.

<sup>5</sup>Division of Pediatric Infectious Diseases, David Geffen School of Medicine, University of California, Los Angeles, Marion Davies Children's Health Center, 10833 LeConte Avenue, Los Angeles, CA 90095, USA.

<sup>6</sup>Laboratório de Pesquisa Clínica em Doenças Febris Agudas, Instituto Nacional de Infectologia Evandro Chagas, FIOCRUZ, 4365 Avenida Brasil, Rio de Janeiro – RJ, 21040-360, Brazil.

\*Correspondence

**a**

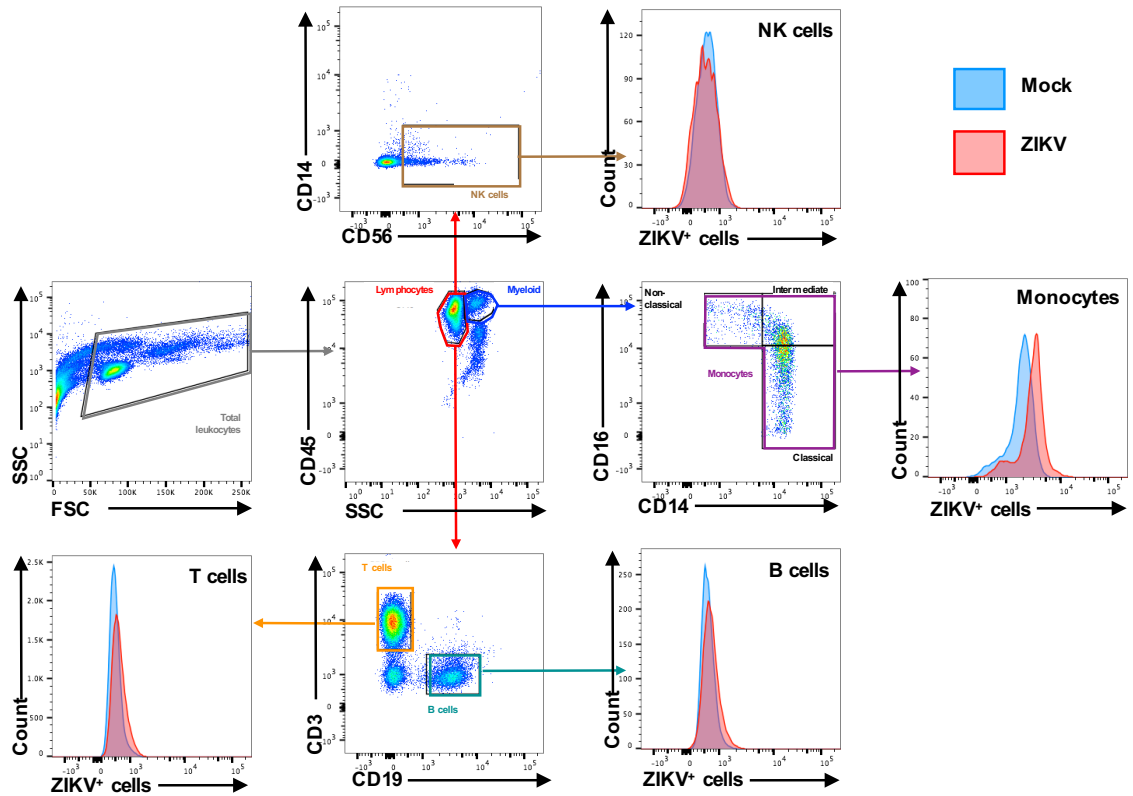

**b**

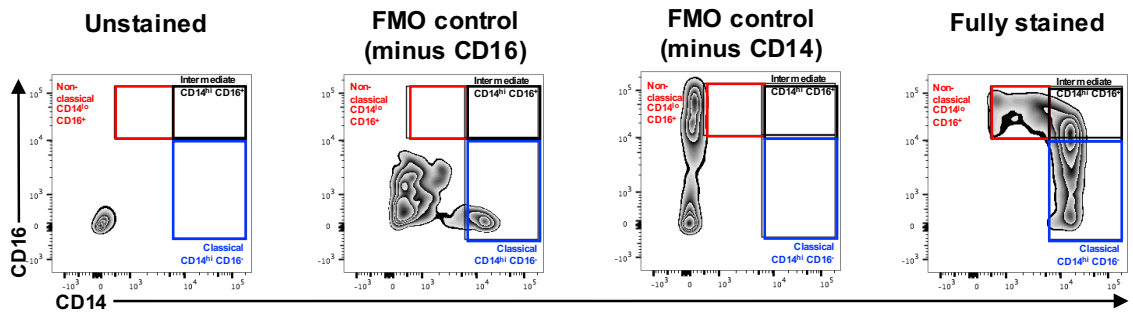

**Supplementary Figure 1. Gating strategy for each immune subset within PBMCs.** PBMCs were isolated from whole blood of healthy donors for FACS surface staining. **a**, Major blood immune subsets which include  $CD3^+ CD19^+$  T cells,  $CD3^- CD19^+$  B cells and  $CD14^- CD56^+$  NK cells were gated from  $CD45^{hi} SSC^{lo}$  lymphocyte population, while  $CD14^{hi/lo} CD16^{+/-}$  monocytes were gated from  $CD45^{hi} SSC^{hi}$  myeloid cells. Gating of  $ZIKV^+$  cells were based on total population of gated monocytes/NK cells/T cells/B cells. **b**, Specific gating strategy for monocyte subsets with the use of fluorescence minus one (FMO) controls.

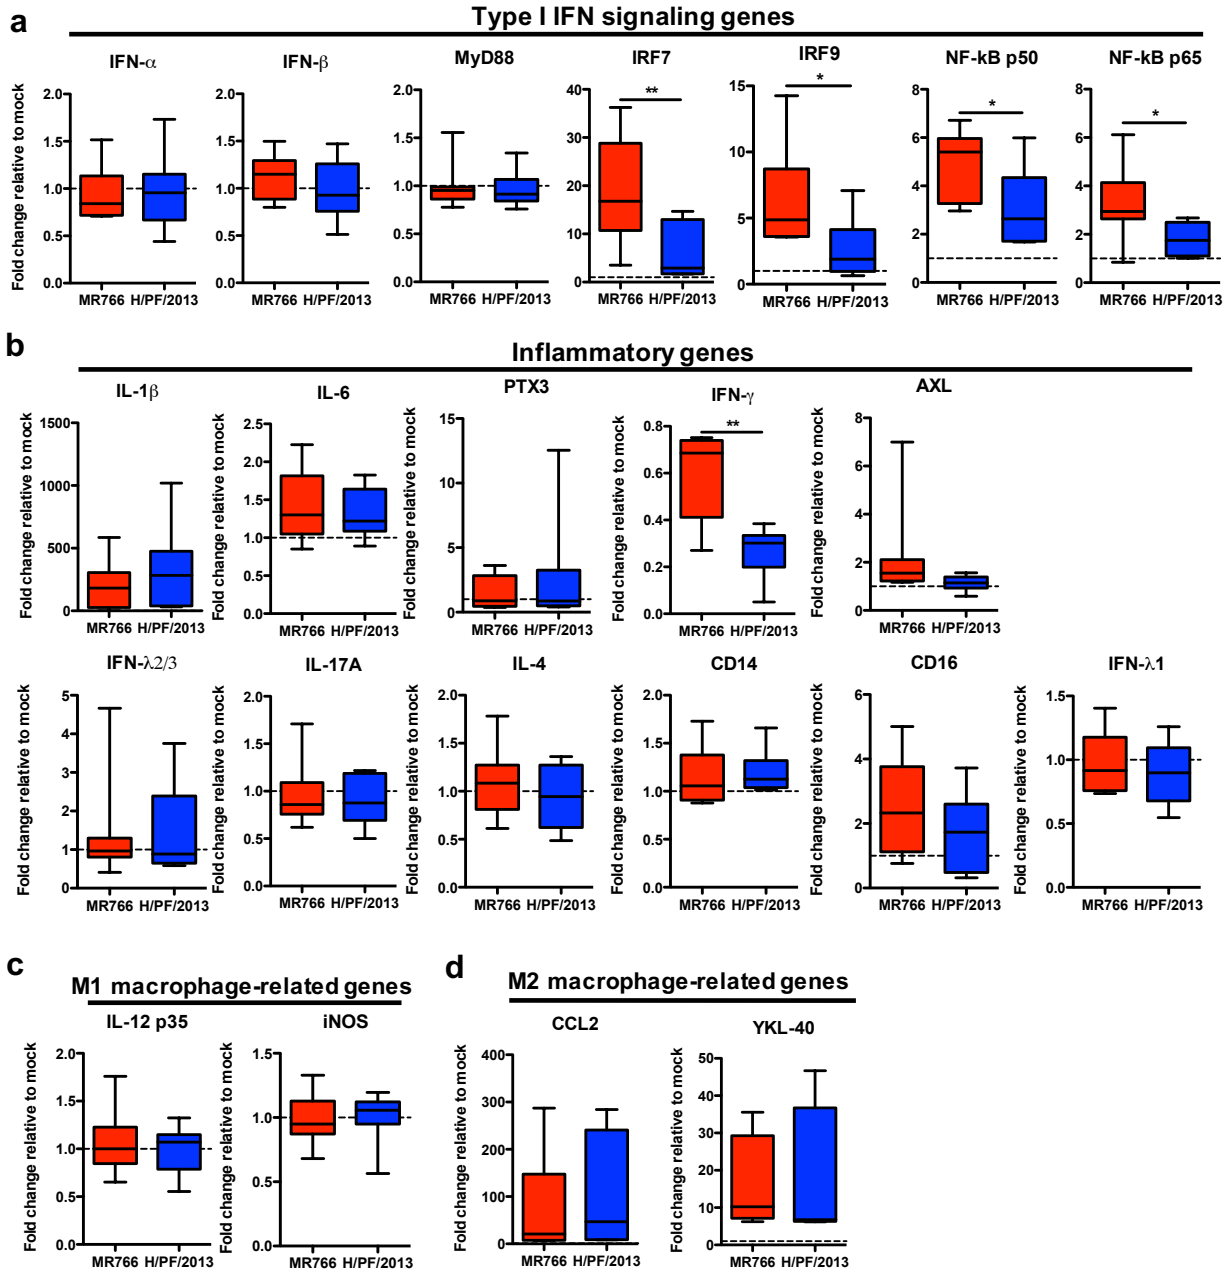

**Supplementary Figure 2. Differential gene induction profiles of PBMCs following infection with different ZIKV lineages.** Gene expression profiling of PBMCs isolated from mock- or ZIKV-infected (MOI 1) whole blood of healthy donors ( $n = 8$ ) at 24 hpi. Gene expression of **a**, type I IFN-signaling genes, **b**, inflammatory genes, **c**, M1 macrophage-related genes and **d**, M2 macrophage-related genes were normalized to GAPDH and expressed as fold change relative to mock controls. Data (mean  $\pm$  SEM) were presented in box plot showing upper (75%) and lower (25%) quartiles, with horizontal line as median and whiskers as maximum and minimum values observed. \*  $P < 0.05$ , \*\*  $P < 0.01$ , Mann-Whitney  $U$  test.

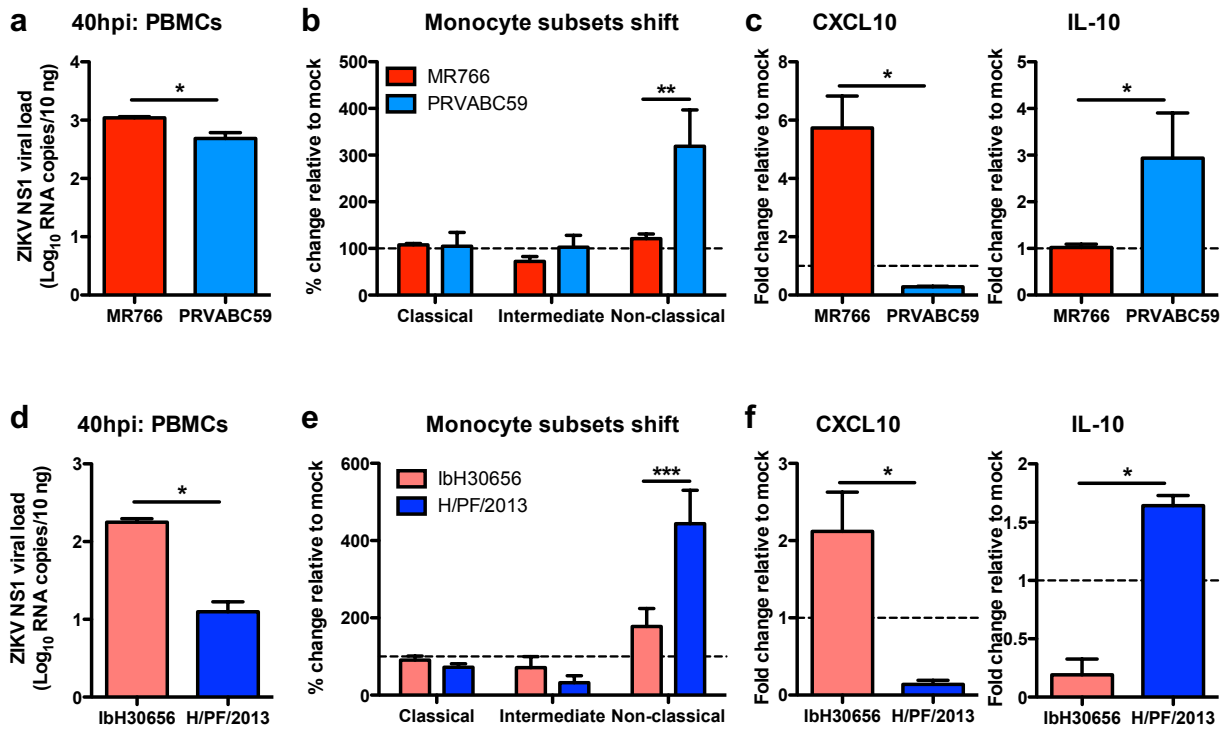

**Supplementary Figure 3. Different virological and immunologic traits between African and Asian lineage ZIKV strains.** Whole blood from healthy donors ( $n = 3$ ) were infected with different ZIKV strains for 40 h prior to the purification of PBMCs. Infection with MR766 (African ZIKV) and PRVABC59 (Asian ZIKV) was performed at MOI 1, while IbH30656 (African ZIKV) and H/PF/2013 (Asian ZIKV) was performed at MOI 0.1. **a,d**, Viral burdens of total PBMCs were detected using viral load qRT-PCR with the specific probes and primers against the ZIKV NS1 RNA. **b,e**, FACS analyses were performed to determine classical ( $CD14^+ CD16^-$ ), intermediate ( $CD14^{hi} CD16^+$ ) and non-classical ( $CD14^{lo} CD16^+$ ) monocyte subsets of mock- and ZIKV-infected PBMCs. **c,f**, Expression of *CXCL10* and *IL-10* genes were normalized to *GAPDH* and expressed as fold changes relative to mock controls. Data (mean  $\pm$  SEM) were presented in box plot showing upper (75%) and lower (25%) quartiles, with horizontal line as median and whiskers as maximum and minimum values observed. \*  $P < 0.05$ , \*\*  $P < 0.01$ , Mann-Whitney  $U$  test in (**a, c, d,f**) or two-way ANOVA, Bonferroni post-test in (**b,e**).

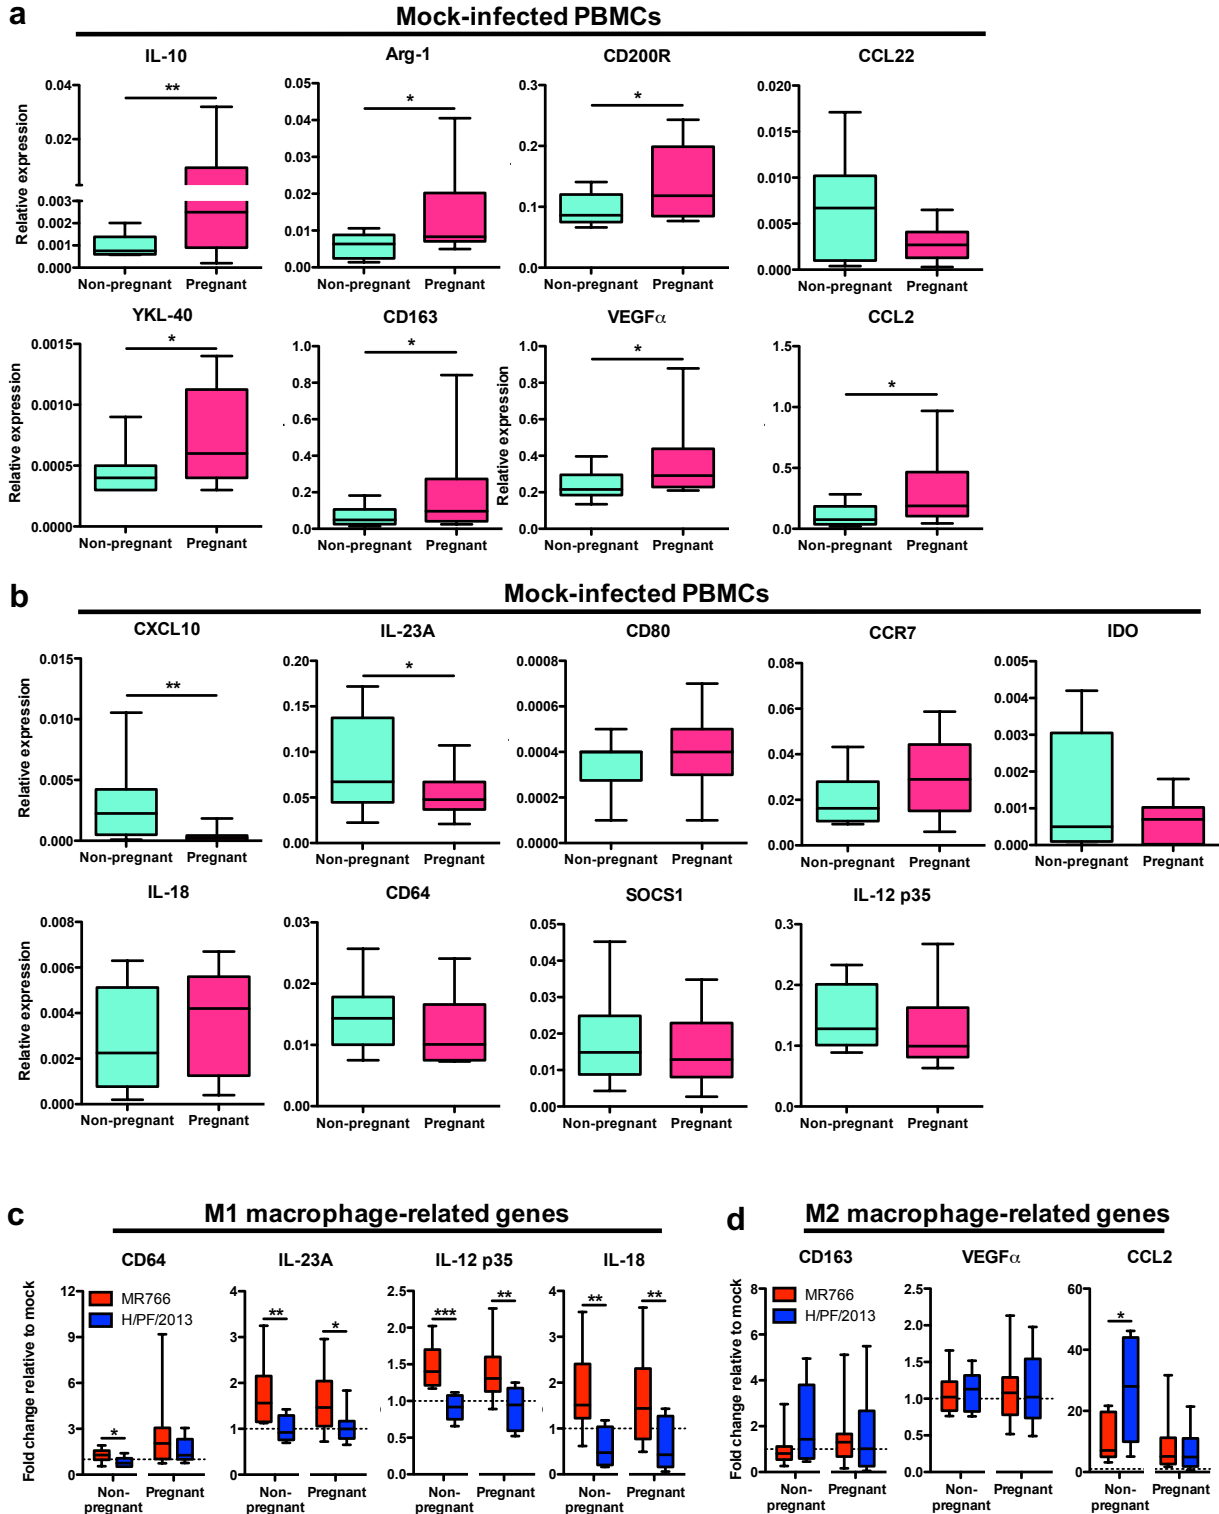

**Supplementary Figure 4. Pregnancy primes blood immunity towards M2-skewed immunosuppression, which was further amplified upon Asian ZIKV infection.** Gene expression profiling of PBMCs isolated from mock- or ZIKV-infected (MOI 1) whole blood of non-pregnant ( $n = 10$ ) and pregnant women ( $n = 5$  per trimester) at 40 hpi. Basal expressions of a,

M2 macrophage-related genes, and b, M1 macrophage-related genes, were determined in mock-infected specimens. Gene expressions were normalized to GAPDH and expressed as relative expression. Additional c, M1 macrophage-related genes and d, M2 macrophage-related genes expressions were determined. Gene expressions were normalized to *GAPDH* and expressed as fold change relative to mock controls. Data (mean  $\pm$  SEM) were presented in box plot showing upper (75%) and lower (25%) quartiles, with horizontal line as median and whiskers as maximum and minimum values observed. \*  $P < 0.05$ , \*\*  $P < 0.01$ , Mann-Whitney *U* test.

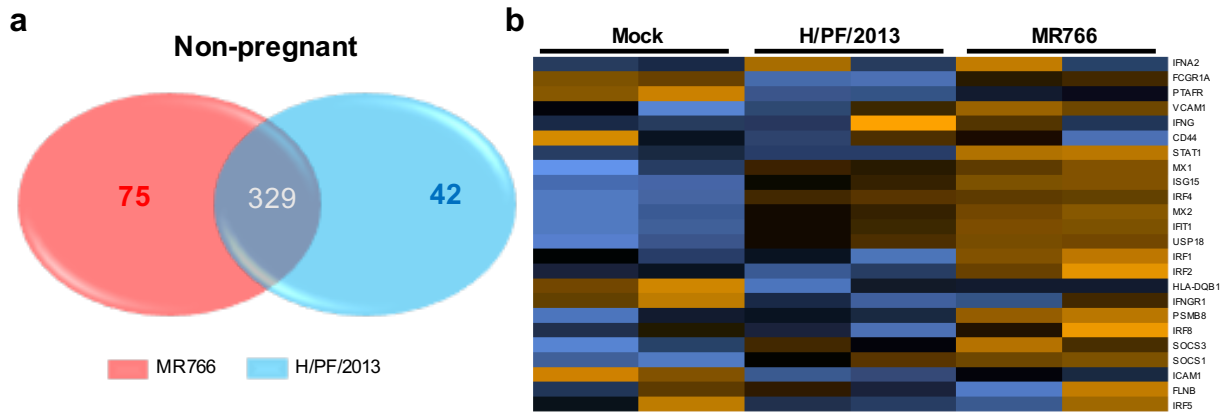

**Supplementary Figure 5. Nanostring analysis of non-pregnant women's monocyte specimens.** Pan monocytes which include classical ( $CD14^+ CD16^-$ ), intermediate ( $CD14^{hi} CD16^+$ ) and non-classical ( $CD14^{lo} CD16^+$ ) monocyte subsets were isolated from mock- and ZIKV-infected (MOI 1) PBMCs harvested at 40 hpi. Whole cell lysates of  $\sim 10,000$  cells/specimen were subjected to NanoString multiplex gene analysis using Human Myeloid panel consisting of  $\sim 600$  genes. a, Venn diagram representation of the numbers of differentially induced genes between MR766 (African ZIKV) and H/PF/2013 (Asian ZIKV) of non-pregnant women's monocytes specimens. b, Heat map representation of IFN-signaling pathway.
